# Supplementary material for: Novel Set of Diarylmethanes to Target Colorectal Cancer: Synthesis, In Vitro and In Silico Studies
Source: MDPI journal article supplement (doi:10.3390/biom13010054), 2022-12-27

## Novel set of diarylmethanes to target colorectal cancer: synthesis, *in vitro* and *in silico* studies

Ameni Hadj Mohamed <sup>[a]</sup> <sup>[b]</sup>, Aline Pinon <sup>[c]</sup>, Nathalie Lagarde <sup>[a]</sup>, Elizabeth Goya Jorge<sup>[d]</sup>, Hadley Mouhsine<sup>[e]</sup>, Moncef Msaddek<sup>[b]</sup>, Bertrand Liagre <sup>\*†[c]</sup>, Maité Sylla-lyarreta Veitía <sup>\*† [a]</sup>

- a. Laboratoire Génomique, Bioinformatique et Chimie Moléculaire (GBCM, EA 7528)  
Conservatoire national des arts et métiers, HESAM Université, 2 rue Conté,  
75003, Paris
- b. Laboratoire de Chimie hétérocyclique, produits naturels et réactivité (LR11ES39)  
Université de Monastir Avenue de l'environnement 5019 Monastir, Tunisie  
Univ. Limoges, LABCiS, UR 22722, F-87000 Limoges, France
- c. Département de sciences des denrées alimentaires, Faculté de Médecine  
vétérinaire (DDA) – FARAH, Université de Liège, avenue de Cureghem 10 4000  
Liège 1, Belgique
- d. Peptinov, Pépinière Paris Santé Cochin, Hôpital Cochin, 29 rue du Faubourg Saint  
Jacques Paris 75014

\*Corresponding authors: Pr. M. Sylla-lyarreta Veitía, [maite.sylla@lecnam.net](mailto:maite.sylla@lecnam.net);

Pr. B. Liagre, [bertrand.liagre@unilim.fr](mailto:bertrand.liagre@unilim.fr)

† These authors contributed equally to the work.

## Cytotoxicity evaluation

80% confluent L929 cells were plated in flat bottom plates at  $4 \times 10^5$  cells per well in 100  $\mu\text{L}$  of DMEM medium containing 10% FBS, 2 mM L-Glutamine, 100 U/mL Penicillin - 100  $\mu\text{g/mL}$  Streptomycin (complete medium) and incubated for one night at 37 °C, 5%  $\text{CO}_2$ . Serial dilutions of compounds (from 100  $\mu\text{M}$  to 0.78  $\mu\text{M}$ ) diluted in complete medium containing 0.5 % DMSO were added to the wells and incubated for 24 hours. Supernatants were discarded and 100  $\mu\text{L}$  of MTT at 0.5 mg/mL were added to the wells. After 2 hours, supernatants were discarded and 200  $\mu\text{L}$  of DMSO were added. Plates were read at 570 nm with a spectrophotometer providing the optical density (OD) of each well and percentages of survival were calculated for each well using the formula:

$$\text{Percentage of survival} = \frac{OD_{\text{compound}}}{OD_{\text{negative control}}} \times 100$$

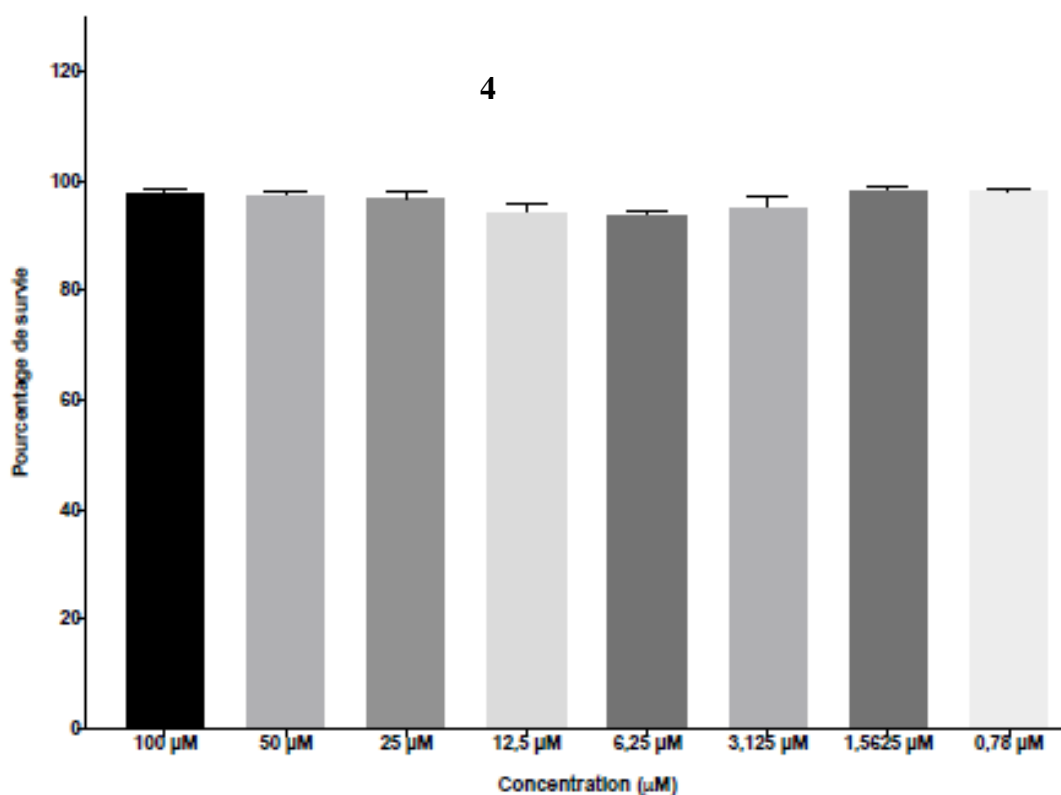

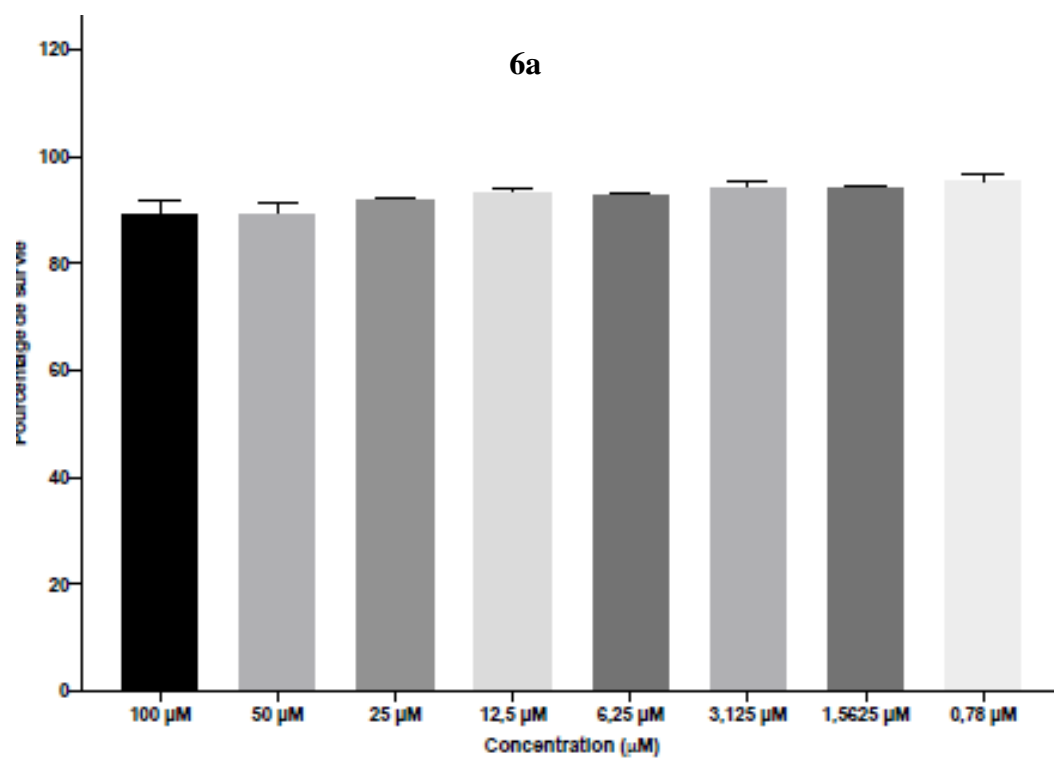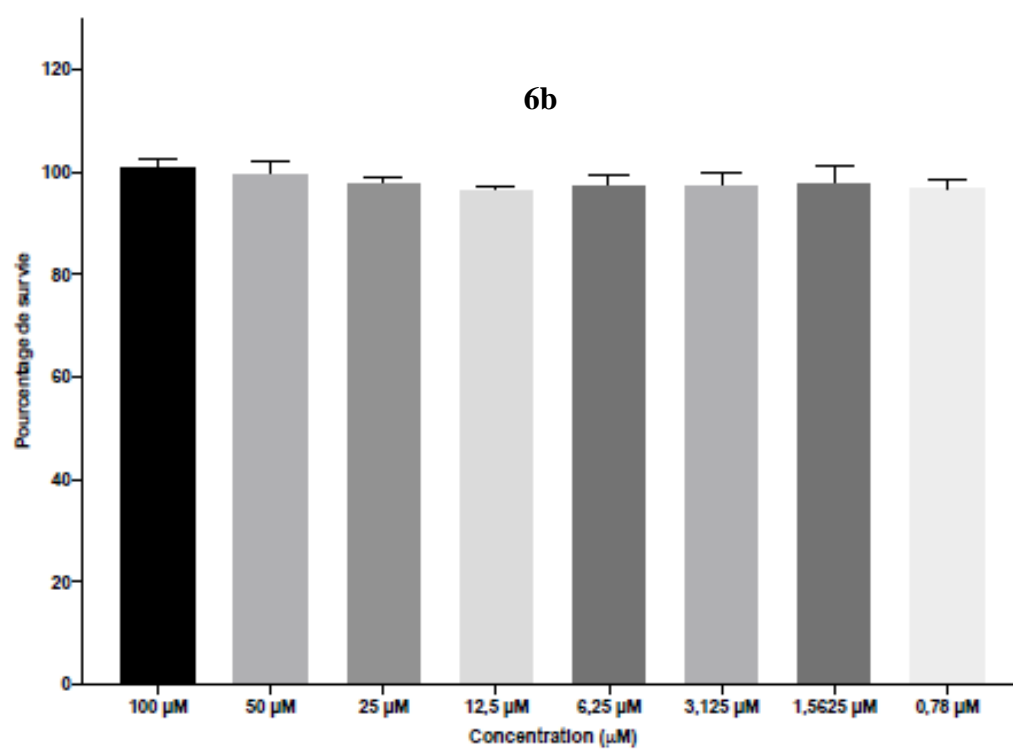

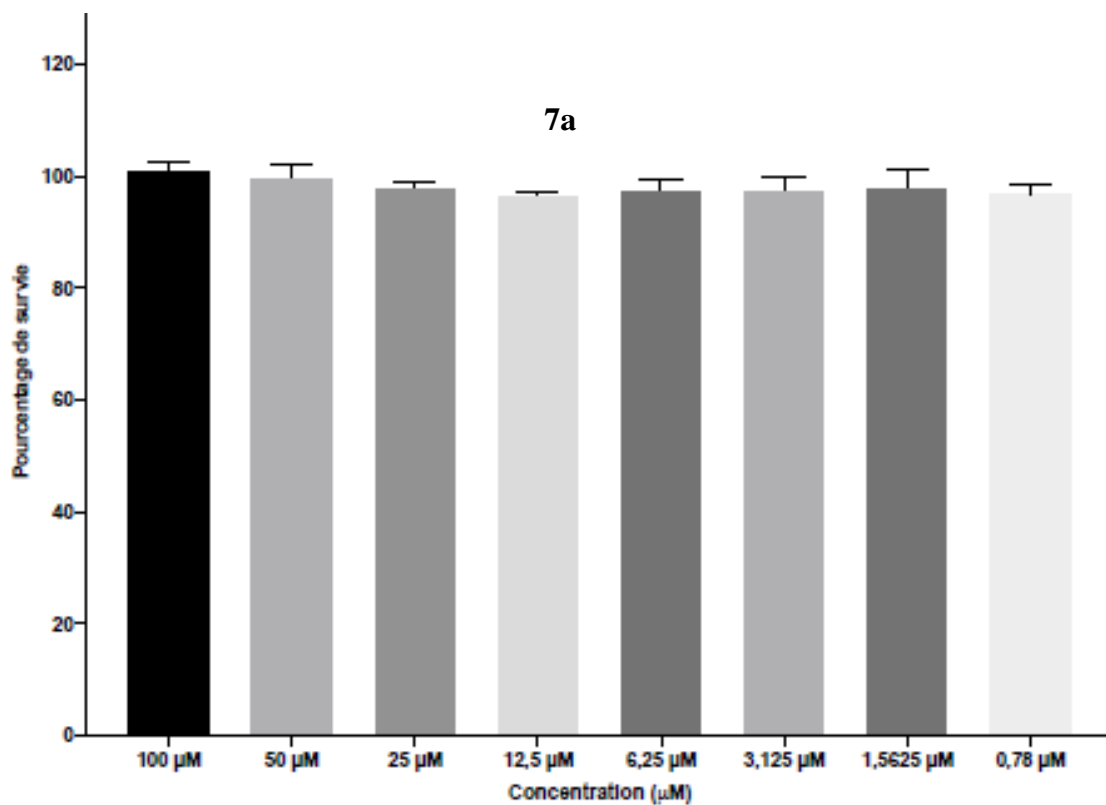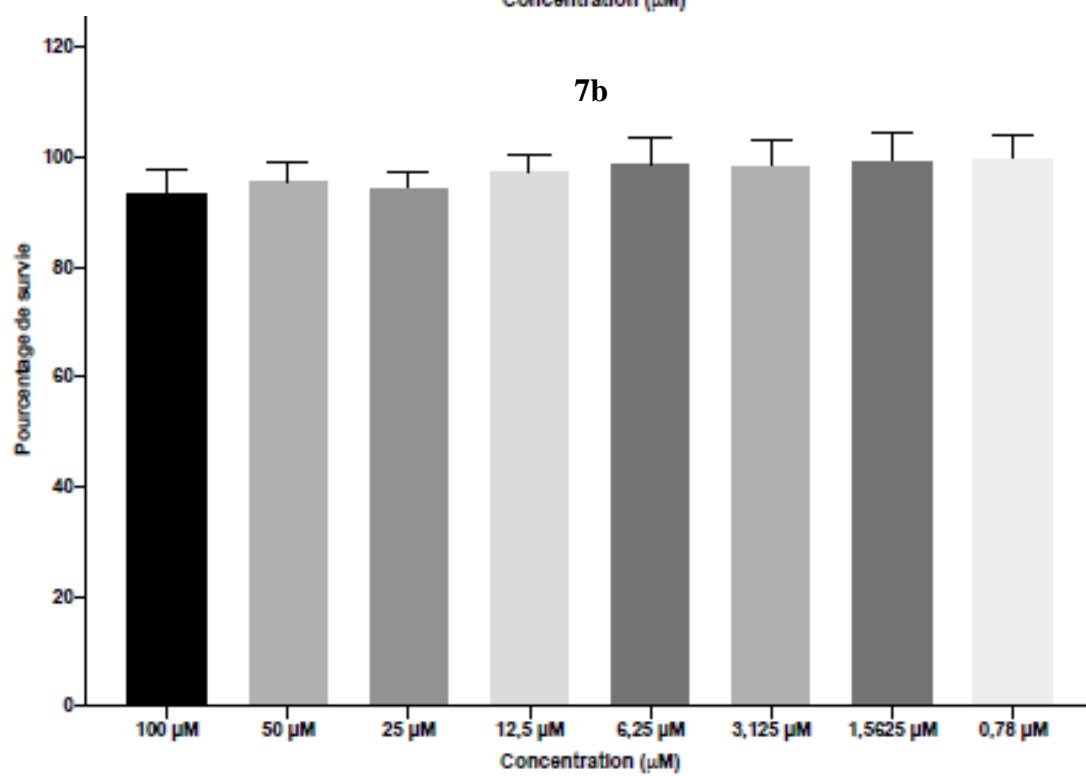

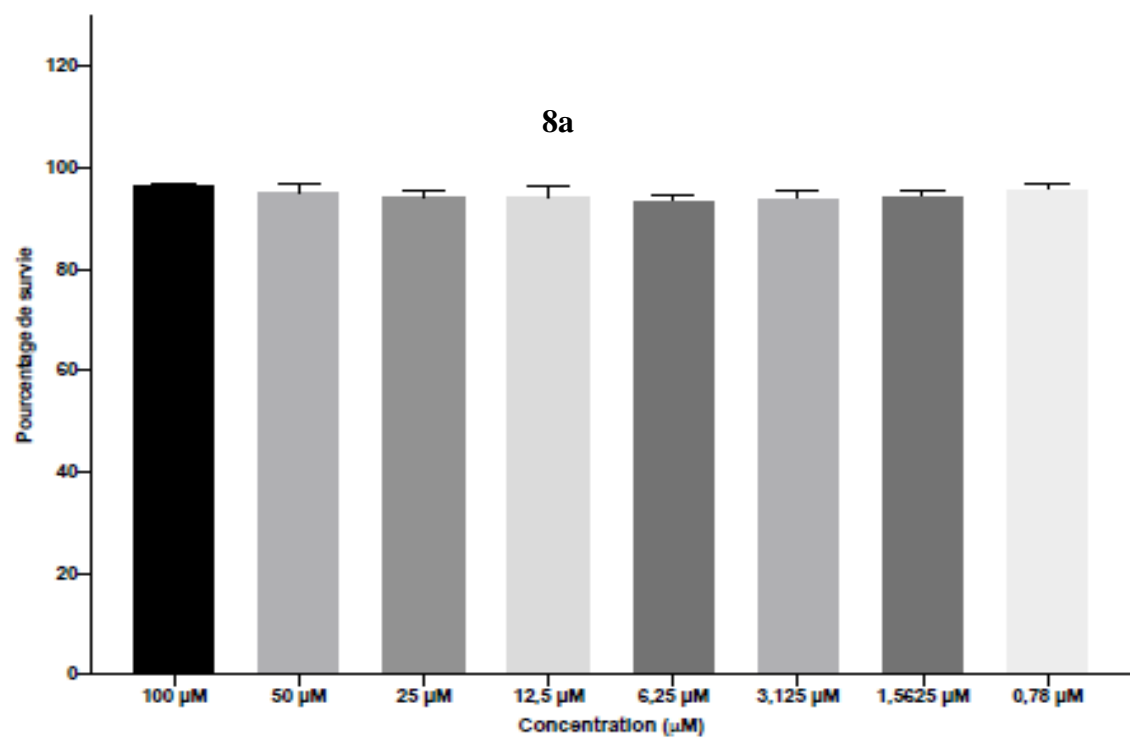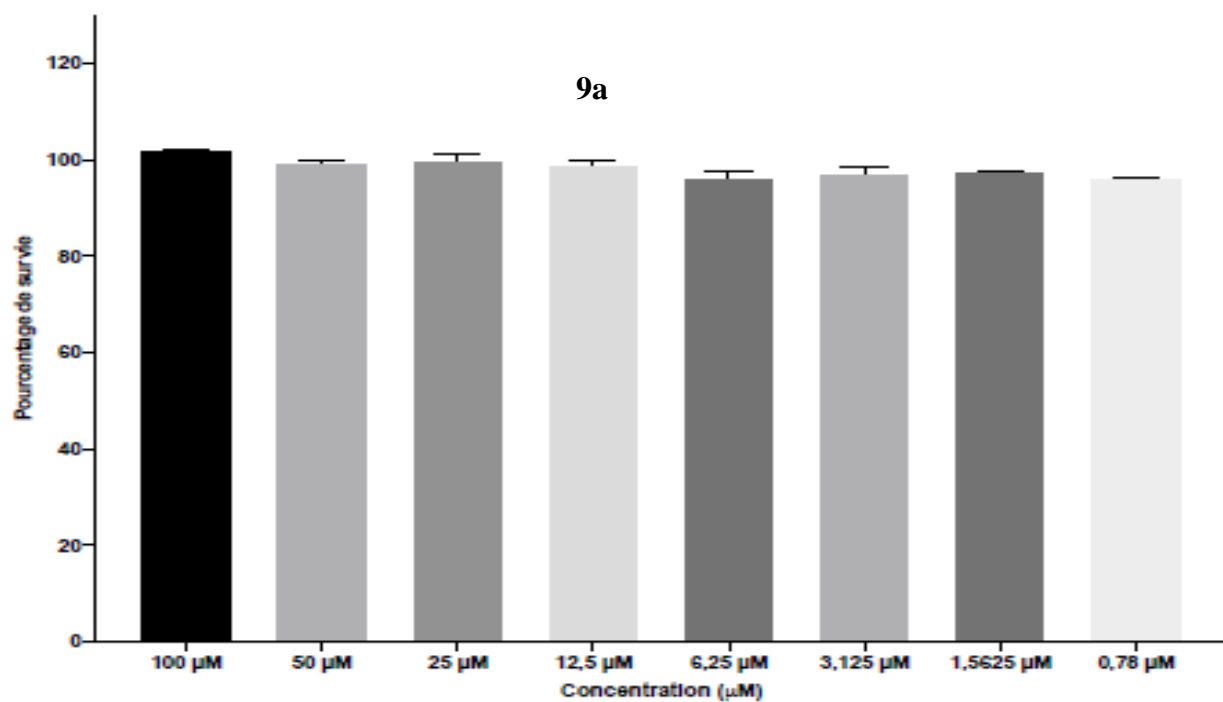

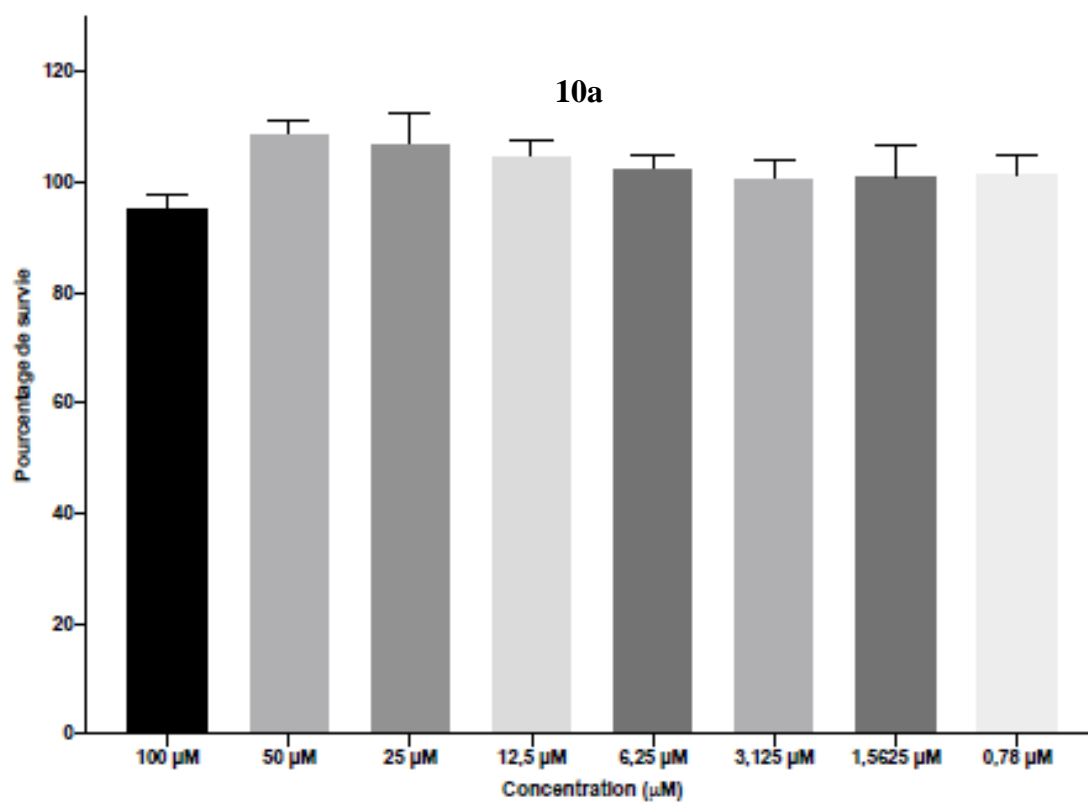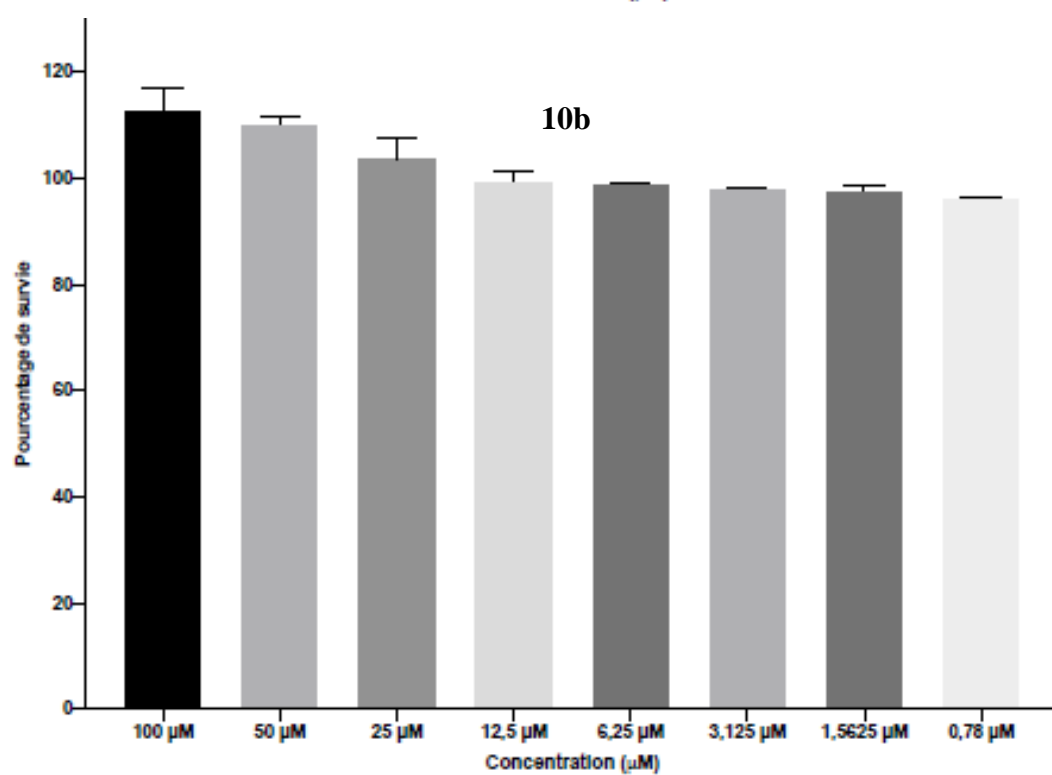

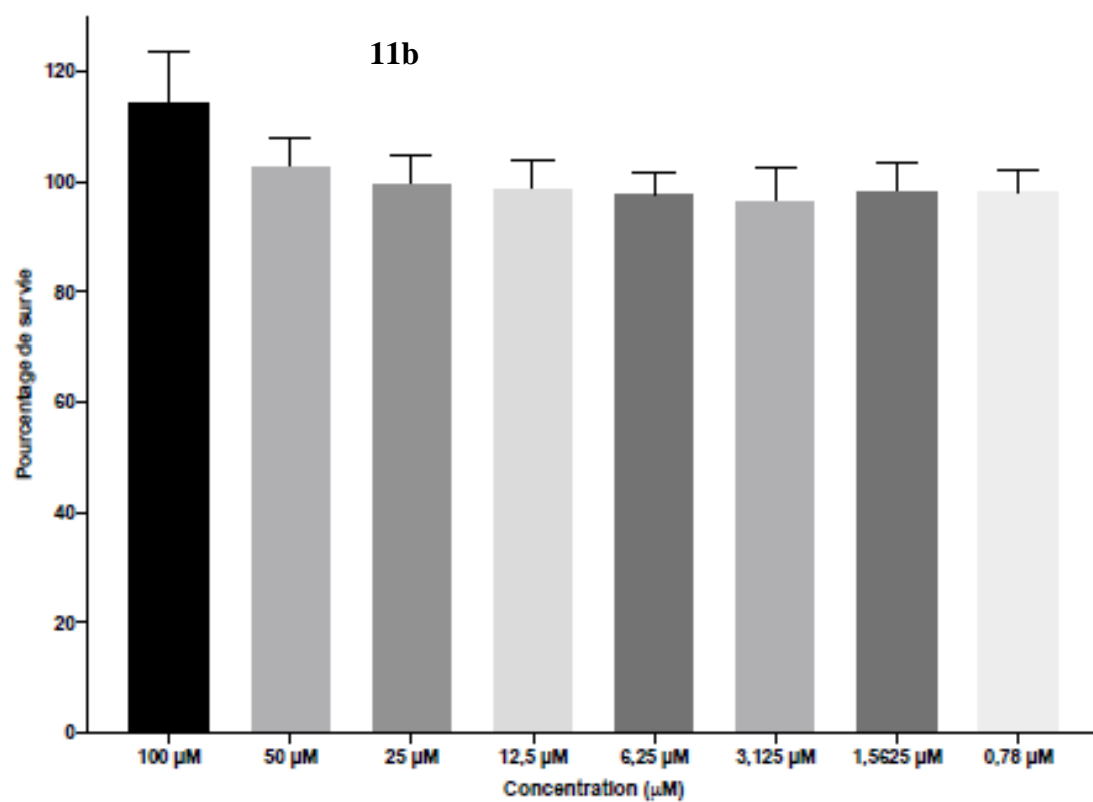

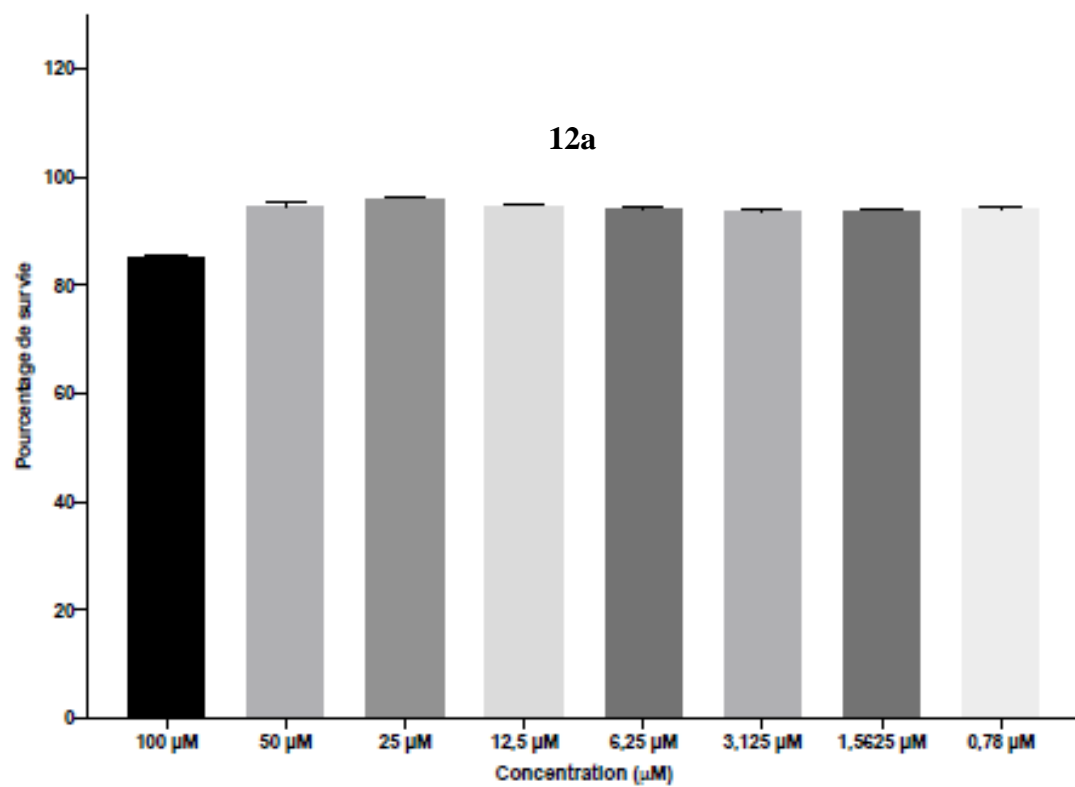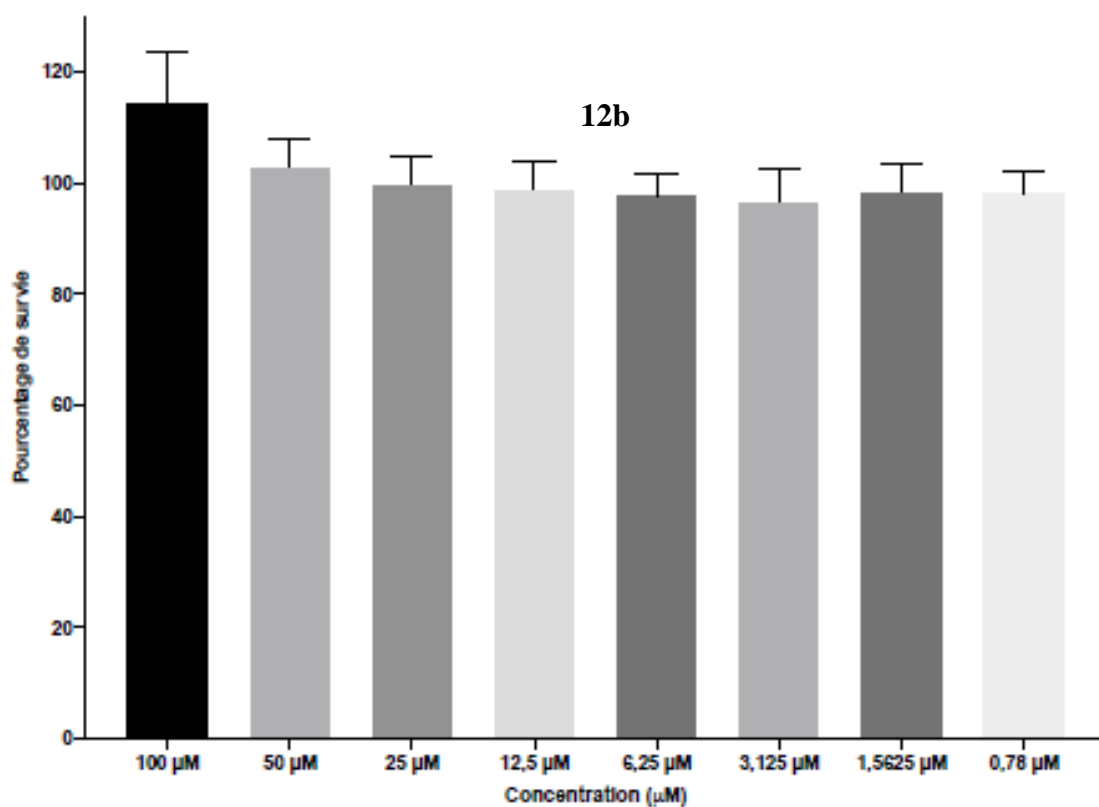



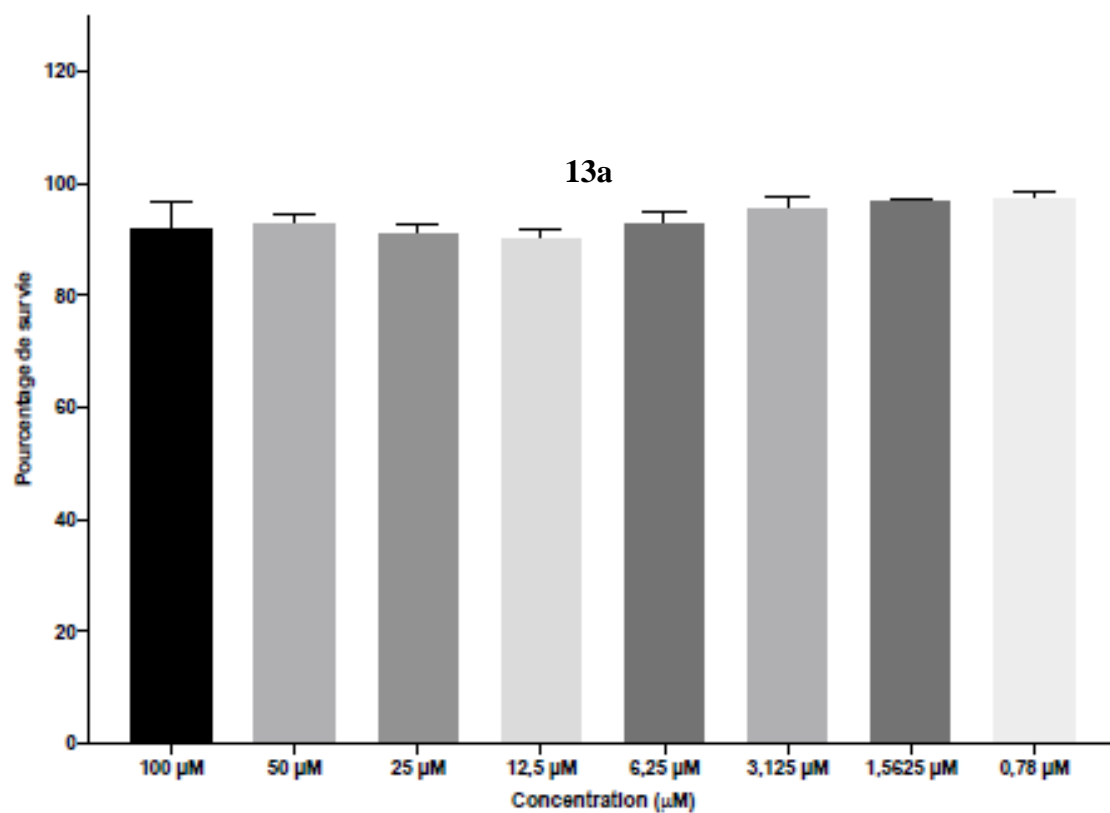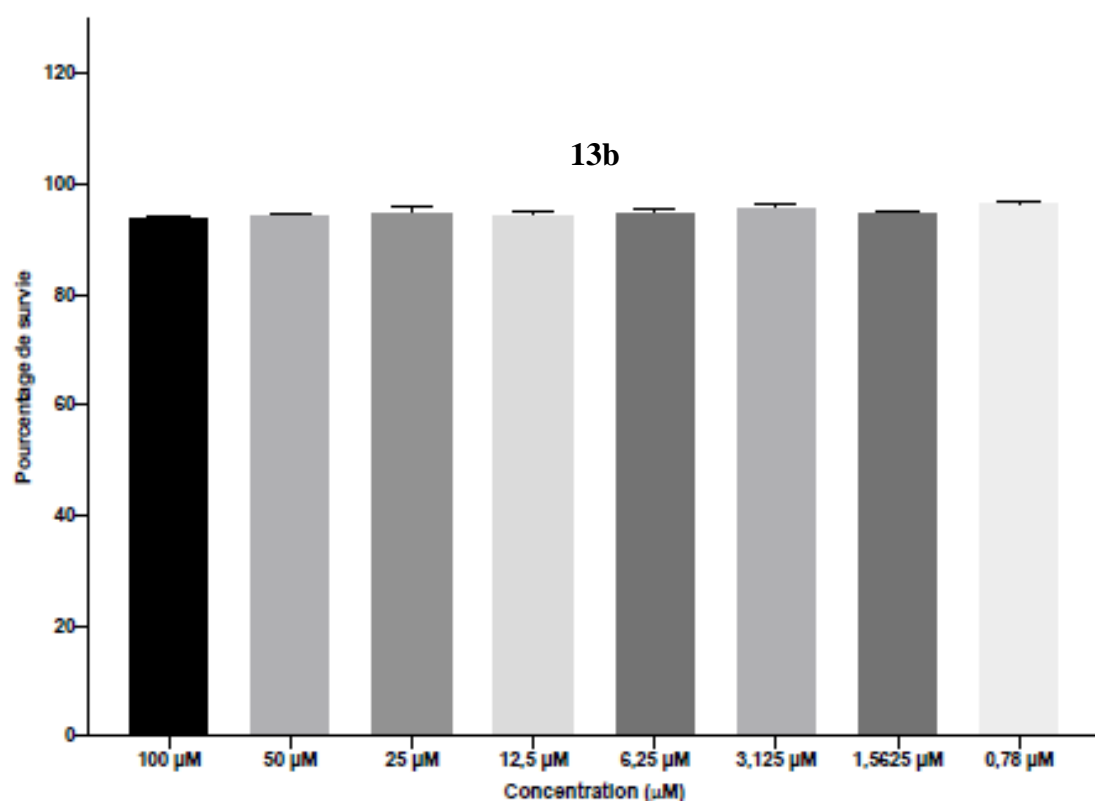

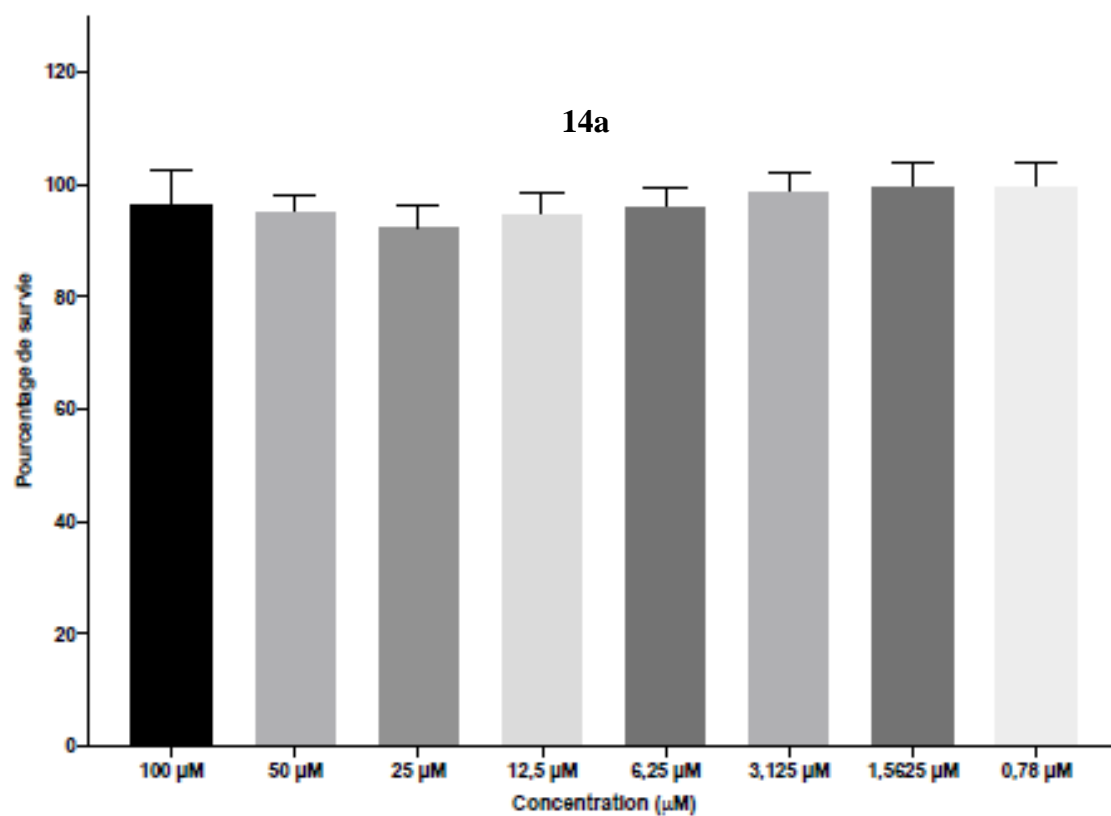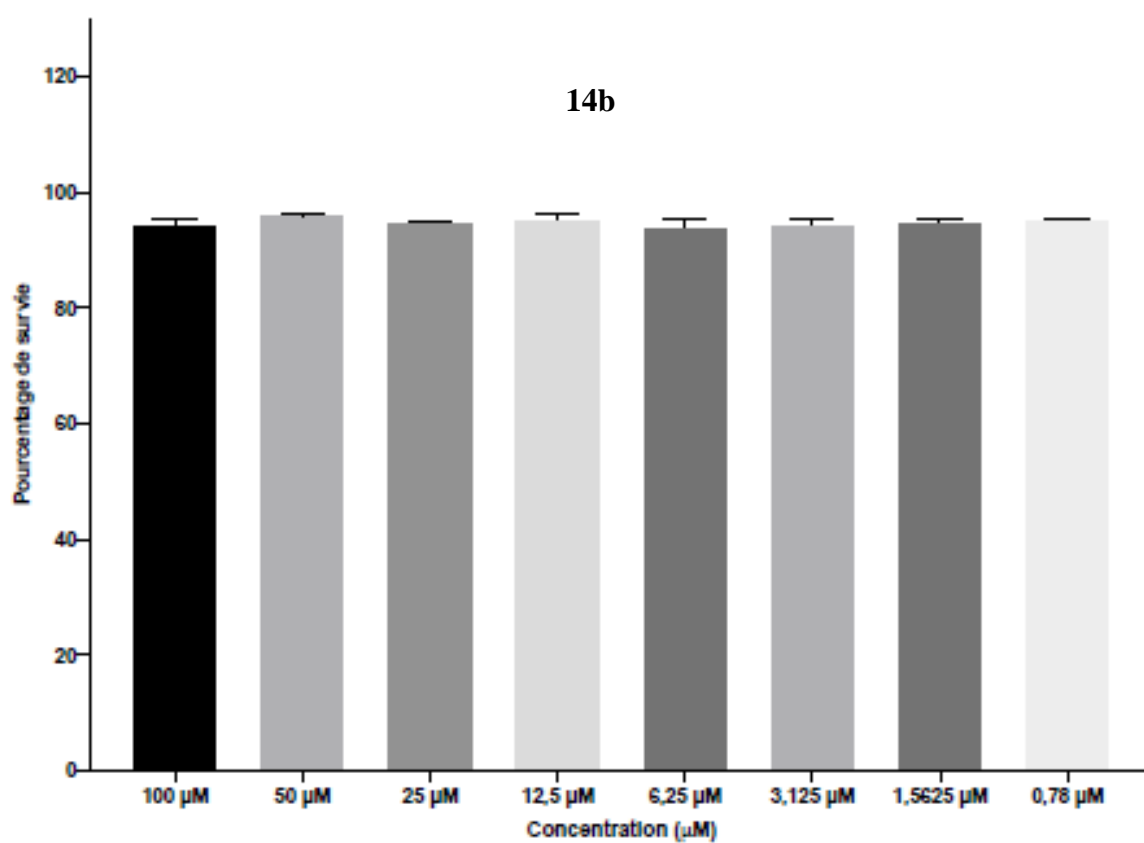

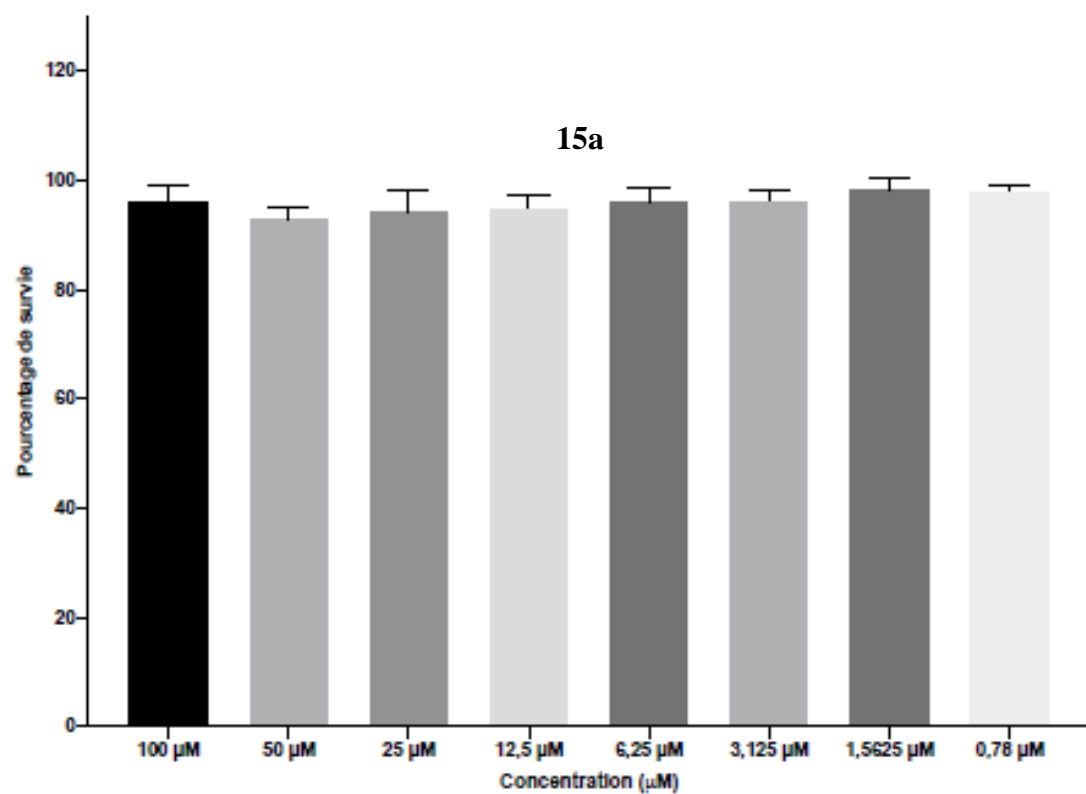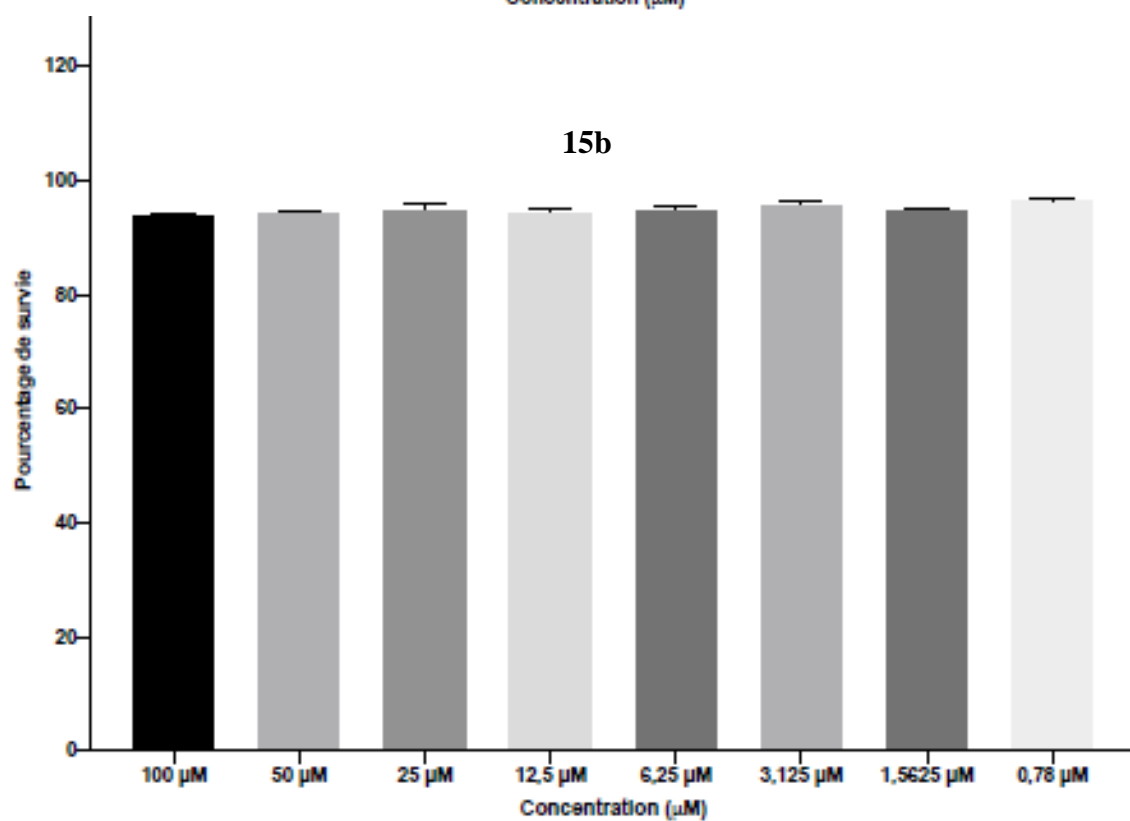

Supplement: s1 [file s1]
