# Supplementary material for: Novel Set of Diarylmethanes to Target Colorectal Cancer: Synthesis, In Vitro and In Silico Studies
Source: MDPI journal article supplement (doi:10.3390/biom13010054), 2022-12-27
Supplement: s1 [file s1]

SI-1

# Novel set of diarylmethanes to target colorectal cancer: synthesis, *in vitro* and *in silico* studies

Ameni Hadj Mohamed <sup>[a]</sup> <sup>[b]</sup>, Aline Pinon <sup>[c]</sup>, Nathalie Lagarde <sup>[a]</sup>, Elizabeth Goya Jorge<sup>[d]</sup>, Hadley Mouhsine<sup>[e]</sup>, Moncef Msaddek<sup>[b]</sup>, Bertrand Liagre <sup>\*†[c]</sup>, Maité Sylla-Iyarreta Veitía <sup>\*†</sup> <sup>[a]</sup>

- a. Laboratoire Génomique, Bioinformatique et Chimie Moléculaire (GBCM, EA 7528) Conservatoire national des arts et métiers, HESAM Université, 2 rue Conté, 75003, Paris
- b. Laboratoire de Chimie hétérocyclique, produits naturels et réactivité (LR11ES39) Université de Monastir Avenue de l'environnement 5019 Monastir, Tunisie Univ. Limoges, LABCiS, UR 22722, F-87000 Limoges, France
- c. Département de sciences des denrées alimentaires, Faculté de Médecine vétérinaire (DDA) – FARAH, Université de Liège, avenue de Cureghem 10 4000 Liège 1, Belgique
- d. Peptinov, Pépinière Paris Santé Cochin, Hôpital Cochin, 29 rue du Faubourg Saint Jacques Paris 75014

\*Corresponding authors: Pr. M. Sylla-Iyarreta Veitía, [maite.sylla@lecnam.net](mailto:maite.sylla@lecnam.net);

Pr. B. Liagre, [bertrand.liagre@unilim.fr](mailto:bertrand.liagre@unilim.fr)

† These authors contributed equally to the work.

Synthesis and characterization of intermediates

### (4-methoxyphenyl)(pyridin-2-yl) methanol **3**

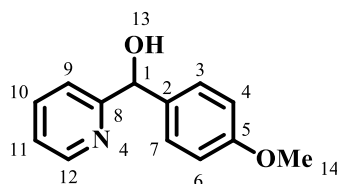

#### Method 1

To a solution of 2-bromopyridine (25 mmol, 2.38 mL) in anhydrous THF (25 mL) at -78 °C, was added dropwise *n*-BuLi (1M) solution in hexane (30 mmol, 30 mL, 1.2 eq) under argon. The mixture was stirred during 1 h 30 min at -78 °C and *p*-anisaldehyde (27.5 mmol, 3.45 mL, 1.1 eq) was then added dropwise and the reaction was stirred at room temperature during 6 days. After reaction completion, the mixture was poured into the water and extracted with DCM. The combined organic extracts were dried over anhydrous MgSO<sub>4</sub>, filtered and concentrated under vacuum. The oily crude was purified by FCC on silica gel (CyHex/ EtOAc, 50:50) to afford the (4-methoxyphenyl)(pyridin-2-yl)methanol **3** as a white solid in 22% yield (1163 mg). A by-product **4** was also isolated as a white solid in 2% yield (96 mg).

#### Method 2

To a solution of 2-bromopyridine (10 mmol, 0.97 mL) in anhydrous THF (10 mL), was added 2M *i*PrMgCl solution in THF (1 eq, 10 mmol, 5 mL) under argon. The reaction was stirred at room temperature during 2 h and *p*-anisaldehyde (1.2 eq, 12 mmol, 1.48 mL) was added then dropwise and the reaction was stirred at room temperature during 2 h. After reaction completion, the mixture was poured into the water and extracted with DCM. The combined organic extracts were dried over anhydrous MgSO<sub>4</sub>, filtered and concentrated under vacuum. The oily crude was purified by FCC on silica gel (CyHex/EtOAc, 50:50) to afford the desired compound **3** as a white solid in 63% yield (1.33 g).

**TLC:** Cyhex/EtOAc: 50:50, R<sub>f</sub> = 0.3

**<sup>1</sup>H NMR (400 MHz, DMSO-*d*<sub>6</sub>) δ (ppm)** : 8.43 (ddd, *J*<sub>12-11</sub> = 4.7 Hz, *J*<sub>12-10</sub> = 1.9 Hz, *J*<sub>12-9</sub> = 0.9 Hz, 1H, H12), 7.76 (td, *J*<sub>10-11</sub>, *J*<sub>10-9</sub> = 7.7 Hz, *J*<sub>10-12</sub> = 1.8 Hz, 1H, H10), 7.53 (d, *J*<sub>9-10</sub> = 7.9 Hz, 1H, H9), 7.29 – 7.26 (m, 2H, H3, H7), 7.22 - 7.19 (m, 1H, H11), 6.86-6.82 (m, 2H, H4, H6), 5.95 (d, *J*<sub>1-13</sub> = 4.2 Hz, 1H, H1), 5.65 (d, *J*<sub>13-1</sub> = 4.2 Hz, 1H, OH), 3.69 (s, 3H, CH<sub>3</sub>).

**<sup>13</sup>C NMR (100 MHz, DMSO-*d*<sub>6</sub>) δ (ppm)** : 164.7 (C5), 158.69 (C8), 148.7 (C12), 137.2 (C10), 136.9 (C2), 128.0 (C3, C7), 122.4 (C9), 120.3 (C11), 113.8 (C4, C6), 75.6 (C13), 55.7 (C1).

**LRMS:** (ES+, CV=30) m/z: 215.23 [M]<sup>+</sup>; 214.15 [M-H]<sup>+</sup>; 198.16 [M-OH]<sup>+</sup>.

**IR v (cm<sup>-1</sup>) :** 3170 (ν<sub>OH</sub>); 3078, 3015 (ν<sub>Csp<sup>2</sup>-H</sub>); 2962 (ν<sub>Csp<sup>3</sup>-H</sub>); 2840 (ν<sub>O-CH<sub>3</sub></sub>); 1593, 1591, 1514 and 1465 (ν<sub>C=C</sub>); 1256 (ν<sub>C-O</sub>); 817 (δ<sub>Csp<sup>2</sup>-H</sub> p-substitution).

**1,2-bis(4-methoxyphenyl)-1-(pyridin-2-yl)ethane-1,2-diol 4**

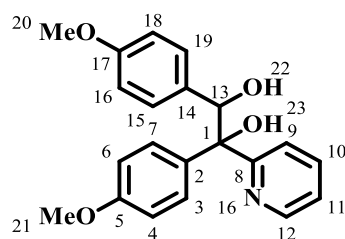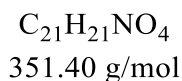

**TLC:** Cyhex/EtOAc: 50:50, R<sub>f</sub> = 0.5

**<sup>1</sup>H NMR (400 MHz, DMSO-*d*<sub>6</sub>) δ (ppm) :** 8.57 (ddd, *J*<sub>12-11</sub> = 4.7 Hz, *J*<sub>12-10</sub> = 1.9 Hz, *J*<sub>12-9</sub> = 0.9 Hz, 1H, H<sub>12</sub>), 7.76 – 7.69 (m, 2H, 2H, H<sub>9</sub>, H<sub>10</sub>), 7.36 - 7.34 (m, 2H, H<sub>14</sub>, H<sub>18</sub>), 7.25 – 7.23 (m, 1H, H<sub>11</sub>), 7.09 (d, *J*<sub>3-4</sub>, *J*<sub>7-8</sub> = 8.6 Hz, 2H, H<sub>3</sub>, H<sub>7</sub>), 6.68-6.62 (m, 4H, H<sub>4</sub>, H<sub>6</sub>, H<sub>15</sub>, H<sub>17</sub>), 5.72 (s, 1H, H<sub>23</sub>, OH), 5.69 (d, *J*<sub>13-22</sub> = 5.3 Hz, 1H, H<sub>13</sub>), 5.41 (d, *J*<sub>22-13</sub> = 5.3 Hz, 1H, OH), 3.64 (s, 3H, CH<sub>3</sub>), 3.62 (s, 3H, CH<sub>3</sub>).

**<sup>13</sup>C NMR (100 MHz, DMSO-*d*<sub>6</sub>) δ (ppm) :** 165.8 (C<sub>8</sub>), 158.2 (C<sub>5</sub>), 157.9 (C<sub>17</sub>), 147.7 (C<sub>12</sub>), 137.01 (C<sub>10</sub>), 136.7 (C<sub>14</sub>), 134.3 (C<sub>2</sub>), 130.15 (C<sub>15</sub>, C<sub>19</sub>), 127.76 (C<sub>3</sub>, C<sub>7</sub>), 122.03 (C<sub>9</sub>), 121.77 (C<sub>11</sub>), 113.04 (C<sub>4</sub>, C<sub>6</sub>), 112.54 (C<sub>16</sub>, C<sub>18</sub>), 80.64 (C<sub>1</sub>), 77.3 (C<sub>13</sub>), 55.27 (C<sub>21</sub>), 55.25 (C<sub>20</sub>).

**LRMS: (ES+, CV=30). m/z :** 352 [M+H]<sup>+</sup>, 374 [M+23+H]<sup>+</sup>; 334 [M-OH]<sup>+</sup>.

**IR v (cm<sup>-1</sup>) :** 3375 (ν<sub>OH</sub>), 3113, 3005 (ν<sub>Csp<sup>2</sup>-H</sub>); 2972, 2932 (ν<sub>Csp<sup>3</sup>-H</sub>); 2840 (ν<sub>OMe</sub>); 1610, 1511 and 1461 (ν<sub>C=C</sub>); 1173 (ν<sub>C-O</sub>); 840 (δ<sub>Csp<sup>2</sup>-H</sub> p-substitution).

**HRMS:** calcd. for C<sub>21</sub>H<sub>21</sub>NO<sub>4</sub>H [M+H]<sup>+</sup> (352.1543); found (353.1385).
